# Supplementary material for: Al/Zn co-incorporated Cu–In–Se quantum dots for high efficiency quantum dot sensitized solar cells
Source: Royal Society of Chemistry journal article supplement (doi:10.1039/c9nj06132k), 2020-01-01
Supplement: c9nj06132k1.pdf [file c9nj06132k1.pdf]

## Supporting Information:

### **Al/Zn co-incorporated Cu-In-Se Quantum Dots for High Efficiency Quantum Dot Sensitized Solar Cells**

Fangfang He,<sup>a</sup> Wei Wang,<sup>a</sup> Weinan Xue,<sup>a</sup> Yiling Xie,<sup>a</sup> Qianwen Zhou,<sup>b</sup> Jiachen Zhang,<sup>a</sup>  
and Yan Li<sup>a,\*</sup>

<sup>a</sup>*Key Laboratory for Advanced Materials, Shanghai Key Laboratory of Functional Materials Chemistry, School of Chemistry and Molecular Engineering, East China University of Science and Technology, Shanghai 200237, China.*

<sup>b</sup>*Department of Chemistry & State Key Laboratory of Molecular Engineering of Polymers, Fudan University, 2005 Songhu Road, Shanghai 200433, P.R. China.*

*\*E-mail: yli@ecust.edu.cn*

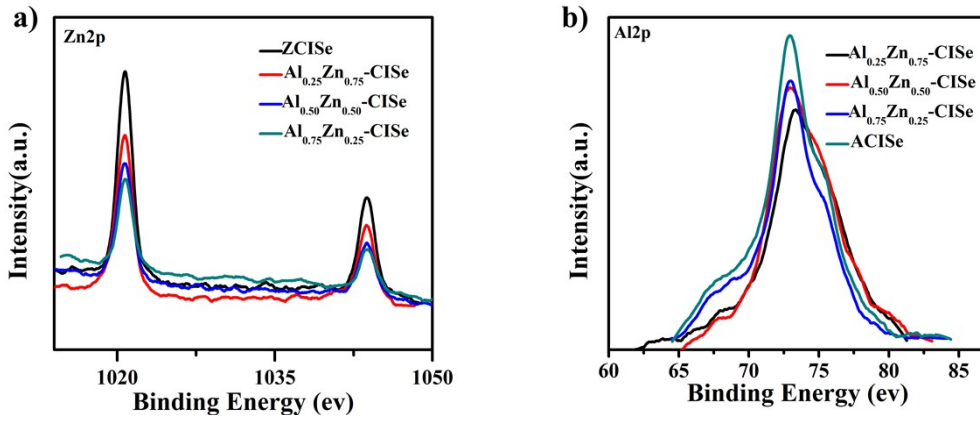

**Figure S1.** XPS images of  $(\text{Al}_x/\text{Zn}_{1-x})\text{-CISE}$  QDs: a) Zn 2p peak and b) Al 2p peak.

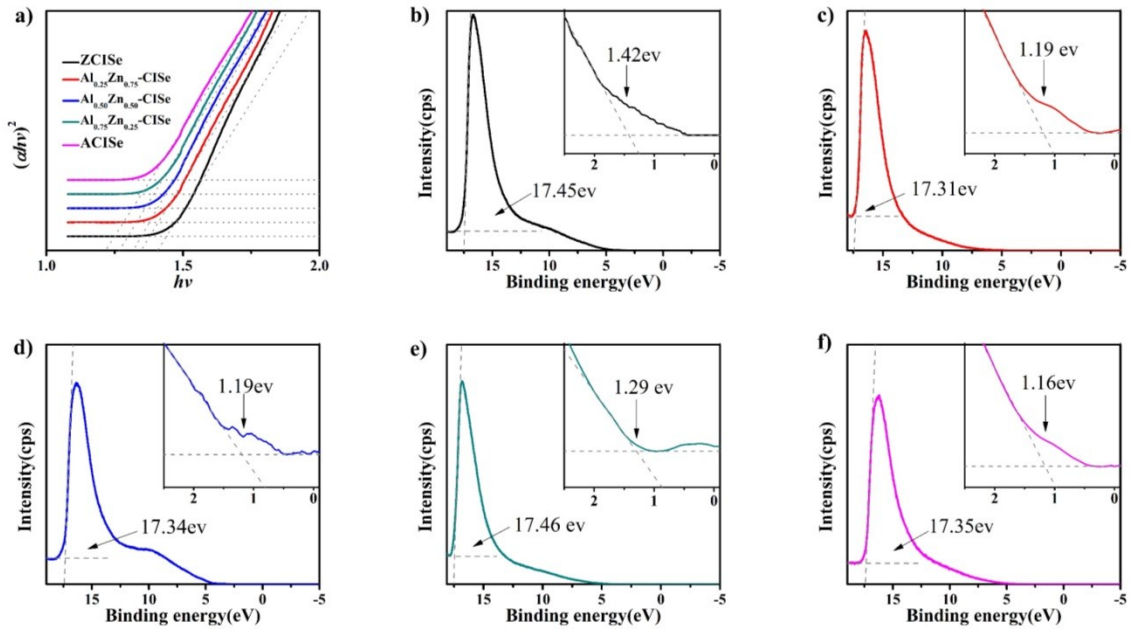

**Figure S2.** (a) Estimation of the optical  $E_g$  from extrapolating the linear portion of the plot of  $(\alpha h\nu)^2$  vs  $h\nu$ . UPS spectra of  $(\text{Al}_x/\text{Zn}_{1-x})\text{-CISE}$  QDs synthesized with various molar percentage of Al: (b)  $x = 0$ , (c)  $x = 0.25$ , (d)  $x = 0.50$ , (e)  $x = 0.75$  and (f)  $x = 1$ .

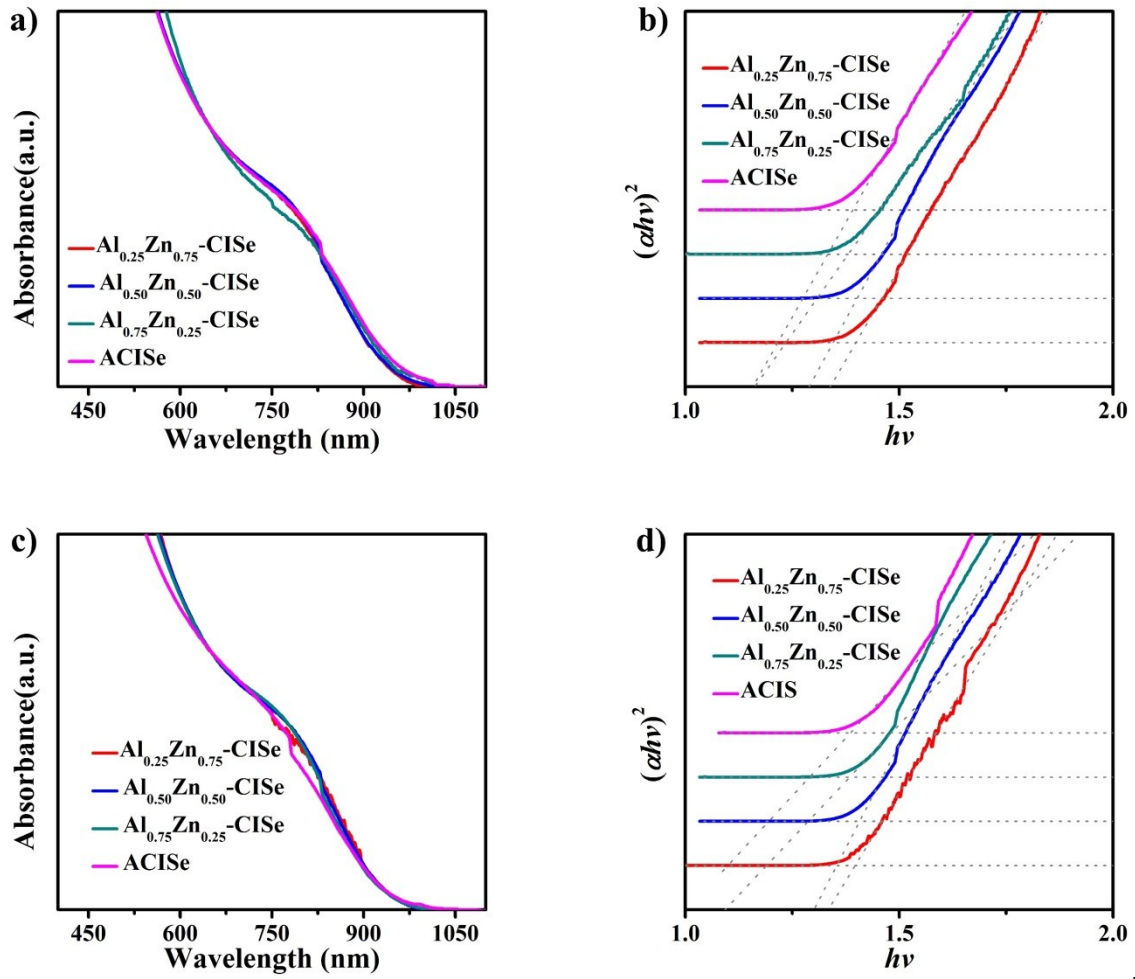

**Figure S3.** Absorption spectra of  $(\text{Al}_x/\text{Zn}_{1-x})\text{-CISE}$  QDs synthesized with (a)  $\text{AlCl}_3$  as Al precursor and (c)  $\text{Al}(\text{NO}_3)_3$  as Al precursor. The estimation of the optical  $E_g$  of  $(\text{Al}_x/\text{Zn}_{1-x})\text{-CISE}$  QDs synthesized with (b)  $\text{AlCl}_3$  as Al precursor and (d)  $\text{Al}(\text{NO}_3)_3$  as Al precursor.

**Table S1.** The parameters of the optical  $E_g$  of  $(\text{Al}_x/\text{Zn}_{1-x})\text{-CISE}$  QDs with different precursors.

| $E_g$                      | ZCISE | $\text{Al}_{0.25}\text{Zn}_{0.75}\text{-CISE}$ | $\text{Al}_{0.50}\text{Zn}_{0.50}\text{-CISE}$ | $\text{Al}_{0.75}\text{Zn}_{0.25}\text{-CISE}$ | ACISE |
|----------------------------|-------|------------------------------------------------|------------------------------------------------|------------------------------------------------|-------|
| $\text{AlSt}_3$            | 1.44  | 1.42                                           | 1.41                                           | 1.39                                           | 1.38  |
| $\text{AlCl}_3$            |       | 1.41                                           | 1.41                                           | 1.38                                           | 1.39  |
| $\text{Al}(\text{NO}_3)_3$ |       | 1.4                                            | 1.41                                           | 1.39                                           | 1.39  |

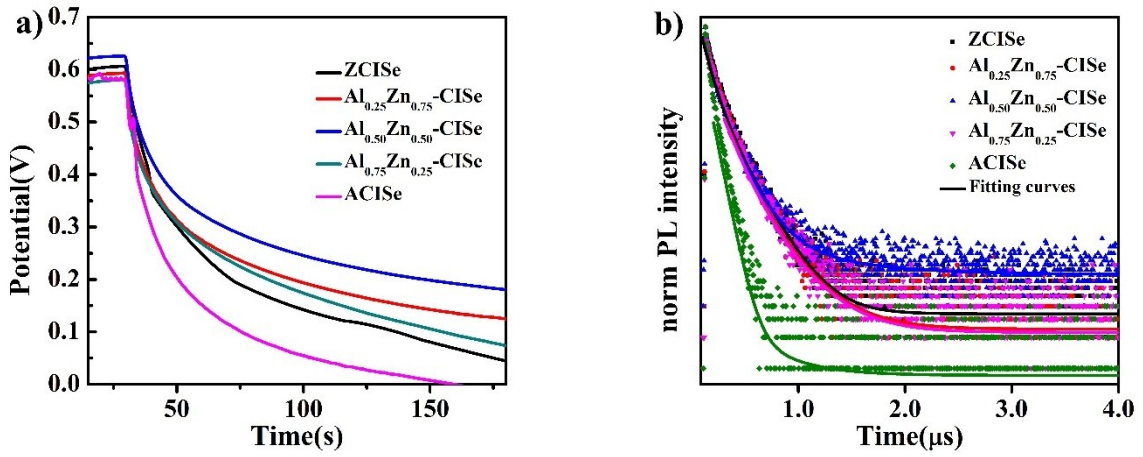

**Figure S4.** (a)  $V_{oc}$  decay curves of  $(Al_x/Zn_{1-x})$ -CISE QDs QDSCs based on a polysulfide electrolyte. (b) The time-resolved PL decay curves of  $(Al_x/Zn_{1-x})$ -CISE QDs.

**Table S2.** The fitting parameters of PL decay curves of  $(Al_x/Zn_{1-x})$ -CISE QDs.

| Samples                    | $\tau_1$ (ns) | Ratio <sub>1</sub> (%) | $\tau_2$ (ns) | Ratio <sub>2</sub> (%) | $\tau_{ave}$ (ns) |
|----------------------------|---------------|------------------------|---------------|------------------------|-------------------|
| ZCISE                      | 99.63         | 50.50                  | 251.33        | 49.50                  | 174.72            |
| $Al_{0.25}Zn_{0.75}$ -CISE | 154.17        | 57.18                  | 333.58        | 42.82                  | 230.99            |
| $Al_{0.50}Zn_{0.50}$ -CISE | 184.11        | 78.24                  | 694.63        | 21.76                  | 295.20            |
| $Al_{0.75}Zn_{0.25}$ -CISE | 144.49        | 56.85                  | 324.98        | 43.15                  | 222.37            |
| ACISE                      | 83.53         | 95.57                  | 387.52        | 4.43                   | 97.00             |
